# Supplementary material for: Mindfulness-Based Movement Intervention to Improve Sleep Quality: A Meta-Analysis and Moderator Analysis of Randomized Clinical Trials
Source: MDPI journal article supplement (doi:10.3390/ijerph191610284), 2022-08-18
Supplement: s1 [file s1]

## Sleep measure scores of included studies

| Author                   | Year | Intervention<br>Group<br>Number | Intervention<br>Baseline<br>Standard<br>Mean | Intervention<br>Baseline<br>Standard | Intervention<br>Final<br>Mean | Intervention<br>Final<br>Standard | Control<br>Group<br>Number<br>Control | Control<br>Baseline<br>Mean | Control<br>Standard | Control<br>Final<br>Mean | Final<br>Standard |
|--------------------------|------|---------------------------------|----------------------------------------------|--------------------------------------|-------------------------------|-----------------------------------|---------------------------------------|-----------------------------|---------------------|--------------------------|-------------------|
| Maryanna Klatt et al.    | 2017 | 27.00                           | 5.93                                         | 1.80                                 | 3.89                          | 1.60                              | 30.00                                 | 5.13                        | 2.28                | 4.83                     | 2.67              |
| Rshikesan et al.         | 2018 | 37.00                           | 5.08                                         | 2.75                                 | 4.16                          | 2.03                              | 35.00                                 | 4.91                        | 2.50                | 4.23                     | 2.45              |
| Curi et al.              | 2018 | 31.00                           | 6.32                                         | 3.16                                 | 5.61                          | 2.93                              | 31.00                                 | 7.07                        | 5.38                | 7.60                     | 5.77              |
| Özkan and Rathfisch      | 2018 | 42.00                           | 7.40                                         | 4.03                                 | 3.31                          | 1.96                              | 42.00                                 | 6.83                        | 3.27                | 8.74                     | 2.80              |
| McQuade et al.           | 2017 | 21.00                           | 6.85                                         | 0.76                                 | 5.16                          | 0.52                              | 24.00                                 | 6.58                        | 0.69                | 5.77                     | 0.50              |
| Aksu et al.              | 2018 | 13.00                           | 2.91                                         | 1.55                                 | 4.39                          | 1.76                              | 13.00                                 | 4.15                        | 3.18                | 9.85                     | 1.99              |
| Kerekes et al.           | 2017 | 77.00                           | 9.70                                         | 4.60                                 | 8.10                          | 3.90                              | 75.00                                 | 10.60                       | 5.10                | 10.00                    | 4.80              |
| Seyedi Chegeni et al.    | 2018 | 45.00                           | 6.33                                         | 3.41                                 | 3.37                          | 2.36                              | 46.00                                 | 6.41                        | 3.12                | 5.58                     | 2.94              |
| Zhu et al.               | 2018 | 42.00                           | 5.03                                         | 2.55                                 | 3.32                          | 1.92                              | 38.00                                 | 6.08                        | 3.06                | 4.50                     | 2.51              |
| Irwin et al.             | 2018 | 45.00                           | 11.50                                        | 0.50                                 | 8.20                          | 0.40                              | 45.00                                 | 11.20                       | 0.40                | 7.30                     | 0.40              |
| Chaoul et al.            | 2018 | 74.00                           | 7.80                                         | 3.70                                 | 7.30                          | 3.60                              | 85.00                                 | 8.10                        | 4.20                | 8.10                     | 4.40              |
| Ebrahimi et al.          | 2017 | 13.00                           | 14.40                                        | 5.92                                 | 3.73                          | 3.49                              | 11.00                                 | 13.91                       | 5.52                | 13.27                    | 5.58              |
| Hariprasad et al.        | 2013 | 62.00                           | 7.65                                         | 3.36                                 | 6.87                          | 3.10                              | 73.00                                 | 8.19                        | 3.46                | 8.78                     | 3.77              |
| Sun et al.               | 2013 | 38.00                           | 9.62                                         | 3.50                                 | 6.30                          | 2.97                              | 37.00                                 | 9.50                        | 3.79                | 10.84                    | 3.76              |
| Black et al.             | 2014 | 24.00                           | 10.20                                        | 1.70                                 | 7.40                          | 1.90                              | 25.00                                 | 10.20                       | 1.80                | 9.10                     | 2.00              |
| Zhang et al.             | 2015 | 30.00                           | 11.50                                        | 3.28                                 | 8.17                          | 2.61                              | 30.00                                 | 11.27                       | 3.62                | 11.47                    | 3.58              |
| Chan et al.              | 2016 | 27.00                           | 10.20                                        | 3.00                                 | 7.80                          | 3.30                              | 25.00                                 | 9.80                        | 3.10                | 9.60                     | 2.40              |
| Chandwani et al.         | 2014 | 53.00                           | 8.30                                         | 0.60                                 | 6.70                          | 0.50                              | 54.00                                 | 8.20                        | 0.50                | 7.30                     | 0.50              |
| Ashrafinia et al.        | 2013 | 40.00                           | 9.97                                         | 2.21                                 | 5.45                          | 1.51                              | 40.00                                 | 10.40                       | 2.68                | 8.35                     | 1.83              |
| Fang and Li              | 2015 | 61.00                           | 9.98                                         | 1.89                                 | 7.61                          | 1.25                              | 59.00                                 | 10.24                       | 2.35                | 10.31                    | 2.42              |
| Chan et al.              | 2014 | 75.00                           | 10.00                                        | 3.70                                 | 8.20                          | 3.40                              | 75.00                                 | 10.20                       | 3.80                | 9.50                     | 3.70              |
| Blake et al.             | 2016 | 63.00                           | 6.23                                         | 2.51                                 | 4.79                          | 1.97                              | 60.00                                 | 6.39                        | 2.83                | 5.93                     | 2.32              |
| Parco M. Siu et al.      | 2021 | 105.00                          | 11.30                                        | 2.90                                 | 7.90                          | 3.80                              | 110.00                                | 11.40                       | 3.20                | 10.90                    | 3.50              |
| Shree Ganesh H.R. et al. | 2021 | 48.00                           | 10.29                                        | 5.32                                 | 10.23                         | 4.60                              | 48.00                                 | 13.15                       | 7.64                | 19.77                    | 9.55              |

## Sleep measure scores of included studies

|                                      |      |       |       |      |       |      |       |       |      |       |      |
|--------------------------------------|------|-------|-------|------|-------|------|-------|-------|------|-------|------|
| Phenphop                             |      |       |       |      |       |      |       |       |      |       |      |
| Phansuea et al.                      | 2020 | 33.00 | 10.00 | 5.14 | 4.82  | 2.30 | 33.00 | 7.79  | 4.22 | 6.94  | 3.59 |
| Marian E. Papp et al.                | 2020 | 19.00 | 7.16  | 4.16 | 6.89  | 3.74 | 17.00 | 7.71  | 5.39 | 7.12  | 5.25 |
| Zülfünaz                             |      |       |       |      |       |      |       |       |      |       |      |
| Ozer and Sebahat Ates                | 2021 | 33.00 | 10.27 | 2.45 | 2.61  | 1.62 | 34.00 | 10.74 | 1.64 | 10.76 | 1.65 |
| Jennifer L. Gordon et al.            | 2021 | 52.00 | 6.40  | 3.40 | 8.10  | 0.20 | 52.00 | 5.80  | 3.30 | 8.70  | 0.20 |
| Keyla de Paula Barbosa et al.        | 2021 | 20.00 | 10.20 | 4.89 | 8.35  | 5.12 | 20.00 | 10.85 | 4.28 | 11.95 | 4.59 |
| Fan et al.                           | 2019 | 67.00 | 9.80  | 3.60 | 6.60  | 3.90 | 72.00 | 9.20  | 3.40 | 9.30  | 4.70 |
| Agustín et al.                       | 2019 | 55.00 | 8.56  | 4.98 | 7.16  | 4.90 | 52.00 | 7.10  | 4.42 | 8.38  | 4.28 |
| Michael et al.                       | 2019 | 19.00 | 8.07  | 3.97 | 6.80  | 4.23 | 17.00 | 6.19  | 3.33 | 6.19  | 3.33 |
| Bai et al.                           | 2019 | 78.00 | 7.73  | 2.95 | 6.62  | 2.25 | 78.00 | 7.46  | 3.09 | 7.41  | 2.98 |
| Lu et al.                            | 2019 | 43.00 | 10.51 | 1.45 | 4.10  | 1.10 | 44.00 | 10.45 | 2.13 | 6.90  | 2.00 |
| Liu et al.                           | 2019 | 45.00 | 11.30 | 3.10 | 7.50  | 2.20 | 46.00 | 11.20 | 2.70 | 10.50 | 2.40 |
| Cetin et al.                         | 2020 | 17.00 | 6.28  | 2.97 | 3.57  | 1.82 | 14.00 | 5.35  | 2.97 | 4.35  | 2.73 |
| Habibollahpour et al.                | 2019 | 38.00 | 13.39 | 2.52 | 8.95  | 2.19 | 37.00 | 13.19 | 2.21 | 13.11 | 2.18 |
| Gulhan et al.                        | 2019 | 25.00 | 8.40  | 2.94 | 5.76  | 1.88 | 25.00 | 6.84  | 2.67 | 6.56  | 2.71 |
| Bower, Julianne E et al.             | 2012 | 16.00 | 9.20  | 3.30 | 8.10  | 2.50 | 15.00 | 9.10  | 3.50 | 7.70  | 2.60 |
| Chen, K. M et al.                    | 2010 | 31.00 | 5.00  | 3.67 | 3.48  | 2.95 | 24.00 | 4.88  | 4.00 | 7.21  | 4.32 |
| Chen, Kuei-Min et al.                | 2009 | 62.00 | 4.65  | 3.16 | 3.34  | 3.01 | 66.00 | 5.47  | 3.41 | 6.38  | 3.01 |
| Frye, B et al.                       | 2011 | 23.00 | 6.40  | 3.84 | 4.90  | 2.59 | 21.00 | 6.20  | 5.04 | 7.00  | 5.07 |
| Lynch, Mary et al.                   | 2012 | 53.00 | 13.79 | 2.95 | 10.50 | 3.94 | 47.00 | 13.09 | 3.79 | 12.47 | 3.02 |
| Nguyen, Manh Hung and Kruse, Andreas | 2012 | 48.00 | 9.38  | 4.99 | 3.59  | 1.56 | 48.00 | 8.06  | 4.09 | 7.97  | 3.78 |
| Wang, W. C et al.                    | 2010 | 16.00 | 7.81  | 4.13 | 5.13  | 3.36 | 13.00 | 7.00  | 4.24 | 6.15  | 3.48 |
| Wolever, Ruth Q et al.               | 2012 | 90.00 | 7.69  | 0.35 | 5.22  | 0.34 | 53.00 | 7.38  | 0.46 | 6.02  | 0.44 |
| Gregoire et al.                      | 2017 | 68.00 | 12.76 | 6.91 | 11.05 | 6.26 | 24.00 | 10.54 | 6.73 | 12.00 | 5.54 |

## Sleep measure scores of included studies

|                       |      |       |        |        |        |       |       |        |       |        |       |
|-----------------------|------|-------|--------|--------|--------|-------|-------|--------|-------|--------|-------|
| Duman and Timur       | 2018 | 81.00 | 14.03  | 3.40   | 7.09   | 3.40  | 80.00 | 14.35  | 3.20  | 13.66  | 4.30  |
| Taşhan                |      |       |        |        |        |       |       |        |       |        |       |
| Zupanec et al.        | 2017 | 11.00 | 456.00 | 105.00 | 498.00 | 65.00 | 9.00  | 488.00 | 36.00 | 495.00 | 59.00 |
| Greeson et al.        | 2014 | 45.00 | 41.36  | 16.21  | 32.52  | 18.06 | 45.00 | 42.91  | 16.21 | 42.84  | 17.23 |
| Emel Sonmezer et al.  | 2021 | 20.00 | 28.46  | 22.76  | 15.79  | 14.18 | 20.00 | 28.98  | 21.99 | 28.70  | 21.77 |
| Di Shao et al.        | 2021 | 72.00 | 7.81   | 4.64   | 5.70   | 3.35  | 72.00 | 6.76   | 3.66  | 6.78   | 3.78  |
| Sanghee Moon et al.   | 2020 | 8.00  | 19.30  | 12.50  | 11.00  | 6.70  | 9.00  | 19.90  | 9.40  | 14.60  | 3.70  |
| AKODU AK et al.       | 2021 | 14.00 | 11.07  | 5.08   | 4.64   | 2.98  | 14.00 | 12.00  | 4.37  | 6.64   | 3.23  |
| Zhang et al.          | 2019 | 35.00 | 17.22  | 4.42   | 10.82  | 5.68  | 35.00 | 16.20  | 3.62  | 15.42  | 5.90  |
| de Bruin et al.       | 2020 | 26.00 | 41.91  | 6.86   | 36.01  | 7.36  | 28.00 | 42.33  | 7.48  | 40.00  | 7.22  |
| Biegel, Gina M et al. | 2009 | 50.00 | 4.82   | 1.23   | 4.65   | 1.25  | 52.00 | 4.56   | 1.14  | 3.56   | 1.16  |
| Chan, A. S et al.     | 2012 | 17.00 | 2.63   | 2.09   | 1.13   | 1.26  | 16.00 | 1.88   | 1.46  | 2.81   | 2.01  |
| Chan, A. S et al.     | 2012 | 17.00 | 6.21   | 2.05   | 7.00   | 2.54  | 16.00 | 6.23   | 2.47  | 5.57   | 2.37  |
| Chattha, R et al.     | 2008 | 54.00 | 0.74   | 0.99   | 0.44   | 0.72  | 54.00 | 0.85   | 0.98  | 0.74   | 0.91  |
| Yurtkuran, M et al.   | 2007 | 20.00 | 4.60   | 3.60   | 3.40   | 5.20  | 20.00 | 4.60   | 3.70  | 4.30   | 8.20  |
