# Supplementary material for: Mindfulness-Based Movement Intervention to Improve Sleep Quality: A Meta-Analysis and Moderator Analysis of Randomized Clinical Trials
Source: MDPI journal article supplement (doi:10.3390/ijerph191610284), 2022-08-18
Supplement: s1 [file s1]

**Table S2. Subgroup analysis based on the health status of the study population**

| Study group                               | Study | Participants | I-V pooled SMD | [95% Conf. Interval] |        | % Weight | <i>P value</i>  |
|-------------------------------------------|-------|--------------|----------------|----------------------|--------|----------|-----------------|
|                                           | N     | N            |                |                      |        |          |                 |
| Health population                         | 22    | 1063         | -0.899         | -1.000               | -0.798 | 35.03    | <i>p</i> <0.001 |
| Clinical patients with physical illnesses | 31    | 1086         | -0.627         | -0.736               | -0.519 | 30.52    | <i>p</i> <0.001 |
| Psychiatric patients                      | 19    | 973          | -0.618         | -0.720               | -0.516 | 34.45    | <i>p</i> <0.001 |

**Table S3. Subgroup analysis based on the age of participants**

| Study group        | Study | Participants | I-V pooled SMD | [95% Conf. Interval] |        | % Weight | <i>P value</i>  |
|--------------------|-------|--------------|----------------|----------------------|--------|----------|-----------------|
|                    | N     | N            |                |                      |        |          |                 |
| Younger adults     | 19    | 921          | -0.618         | -0.715               | -0.520 | 39.67    | <i>p</i> <0.001 |
| Middle-aged adults | 20    | 755          | -0.691         | -0.803               | -0.579 | 29.93    | <i>p</i> <0.001 |
| Older adults       | 18    | 703          | -0.873         | -0.985               | -0.761 | 30.40    | <i>p</i> <0.001 |

**Table S4. Subgroup analysis based on MBMI types**

| Study group              | Study | Participants | I-V           | [95% Conf. | %      | <i>P value</i>  |
|--------------------------|-------|--------------|---------------|------------|--------|-----------------|
|                          | N     | N            | pooled<br>SMD | Interval]  | Weight |                 |
| Yoga/Pilates             | 25    | 1076         | -0.808        | -0.901     | -      | 40.98           |
|                          |       |              |               |            | 0.715  | <i>p</i> <0.001 |
| Tai Chi/Qigong/Baduanjin | 18    | 682          | -0.567        | -0.680     | -      | 28.35           |
|                          |       |              |               |            | 0.455  | <i>p</i> <0.001 |
| MBMI combined with       | 18    | 756          | -0.741        | -0.849     | -      | 30.67           |
| mindfulness or muscle    |       |              |               |            | 0.633  | <i>p</i> <0.001 |
| relaxation techniques    |       |              |               |            |        |                 |

**Table S5. Subgroup analysis based on the duration of intervention**

| Study group | Study | Participants | I-V pooled SMD | [95% Conf. Interval] |        | % Weight | <i>P value</i>  |
|-------------|-------|--------------|----------------|----------------------|--------|----------|-----------------|
|             | N     | N            |                |                      |        |          |                 |
| ≤3 months   | 48    | 1943         | -0.714         | -0.784               | -0.644 | 73.45    | <i>p</i> <0.001 |
| >3 months   | 14    | 659          | -0.829         | -0.945               | -0.712 | 26.55    | <i>p</i> <0.001 |

**Table S6. Subgroup analysis based on intervention frequencies**

| Study group | Study | Participants | I-V pooled SMD | [95% Conf. Interval] |        | % Weight | <i>P value</i>  |
|-------------|-------|--------------|----------------|----------------------|--------|----------|-----------------|
|             | N     | N            |                |                      |        |          |                 |
| ≤1/week     | 15    | 647          | -0.687         | -0.804               | -0.570 | 29.2     | <i>p</i> <0.001 |
| >1/week     | 40    | 1594         | -0.793         | -0.868               | -0.718 | 70.71    | <i>p</i> <0.001 |

**Table S7. Subgroup analysis based on total intervention hours**

| Study group | Study | Participants | I-V pooled SMD | [95% Conf. Interval] |        | % Weight | <i>P value</i>  |
|-------------|-------|--------------|----------------|----------------------|--------|----------|-----------------|
|             | N     | N            |                |                      |        |          |                 |
| ≤24 h       | 35    | 1394         | -0.746         | -0.827               | -0.665 | 63.34    | <i>p</i> <0.001 |
| > 24 h      | 17    | 767          | -0.759         | -0.865               | -0.653 | 36.66    | <i>p</i> <0.001 |
