# Supplementary material for: Mindfulness-Based Movement Intervention to Improve Sleep Quality: A Meta-Analysis and Moderator Analysis of Randomized Clinical Trials
Source: MDPI journal article supplement (doi:10.3390/ijerph191610284), 2022-08-18
Supplement: s1 [file s1]

**Table S1. Egger's test with pseudo 95% confidence limits.**

| Std Eff | Coef.     | std. Err. | t     | P> t  | [95% Conf. Interval] |          |
|---------|-----------|-----------|-------|-------|----------------------|----------|
| slope   | -.28426   | .3439116  | -0.83 | 0.412 | -.9724256            | .4039056 |
| bias    | -1.907378 | 1.443505  | -1.32 | 0.191 | -4.795825            | .9810681 |
