# Supplementary material for: Mindfulness-Based Movement Intervention to Improve Sleep Quality: A Meta-Analysis and Moderator Analysis of Randomized Clinical Trials
Source: MDPI journal article supplement (doi:10.3390/ijerph191610284), 2022-08-18
Supplement: s1 [file s1]

## **Search Strategy**

Mind Body Therapies OR Mind-Body Therapy OR Therapies, Mind-Body OR  
Therapy, Mind-Body OR Mind-Body Medicine OR Mind Body Medicine OR mind  
body OR Mindfulness OR mindfulness-based stress reduction (MBSR) OR  
mindfulness-based cognitive therapy (MBCT) OR Vipassanā OR Meditation OR  
Transcendental Meditation OR Meditation, Transcendental OR Yoga OR Tai Ji OR  
Tai-ji OR Tai Chi OR Chi, Tai OR Tai Ji Quan OR Ji Quan, Tai OR Quan, Tai Ji OR  
Taiji OR Taijiquan OR T'ai Chi OR Tai Chi Chuan OR Qigong OR Qi Gong OR Ch'i  
Kung OR Pilates OR Movement Techniques, Exercise OR Exercise Movement  
Technics OR Pilates-Based Exercises OR Exercises, Pilates-Based OR Pilates Based  
Exercises OR Pilates Training OR Training, Pilates AND sleep OR Sleeping Habits  
OR Sleep Habits OR Habit, Sleep OR Habits, Sleep OR Sleep Habit OR Sleeping  
Habit OR Habit, Sleeping OR Habits, Sleeping AND randomized controlled trial OR  
Randomized OR Placebo OR RCT
