# Supplementary figures and images for: Mindfulness-Based Movement Intervention to Improve Sleep Quality: A Meta-Analysis and Moderator Analysis of Randomized Clinical Trials
Source: MDPI journal article supplement (doi:10.3390/ijerph191610284), 2022-08-18

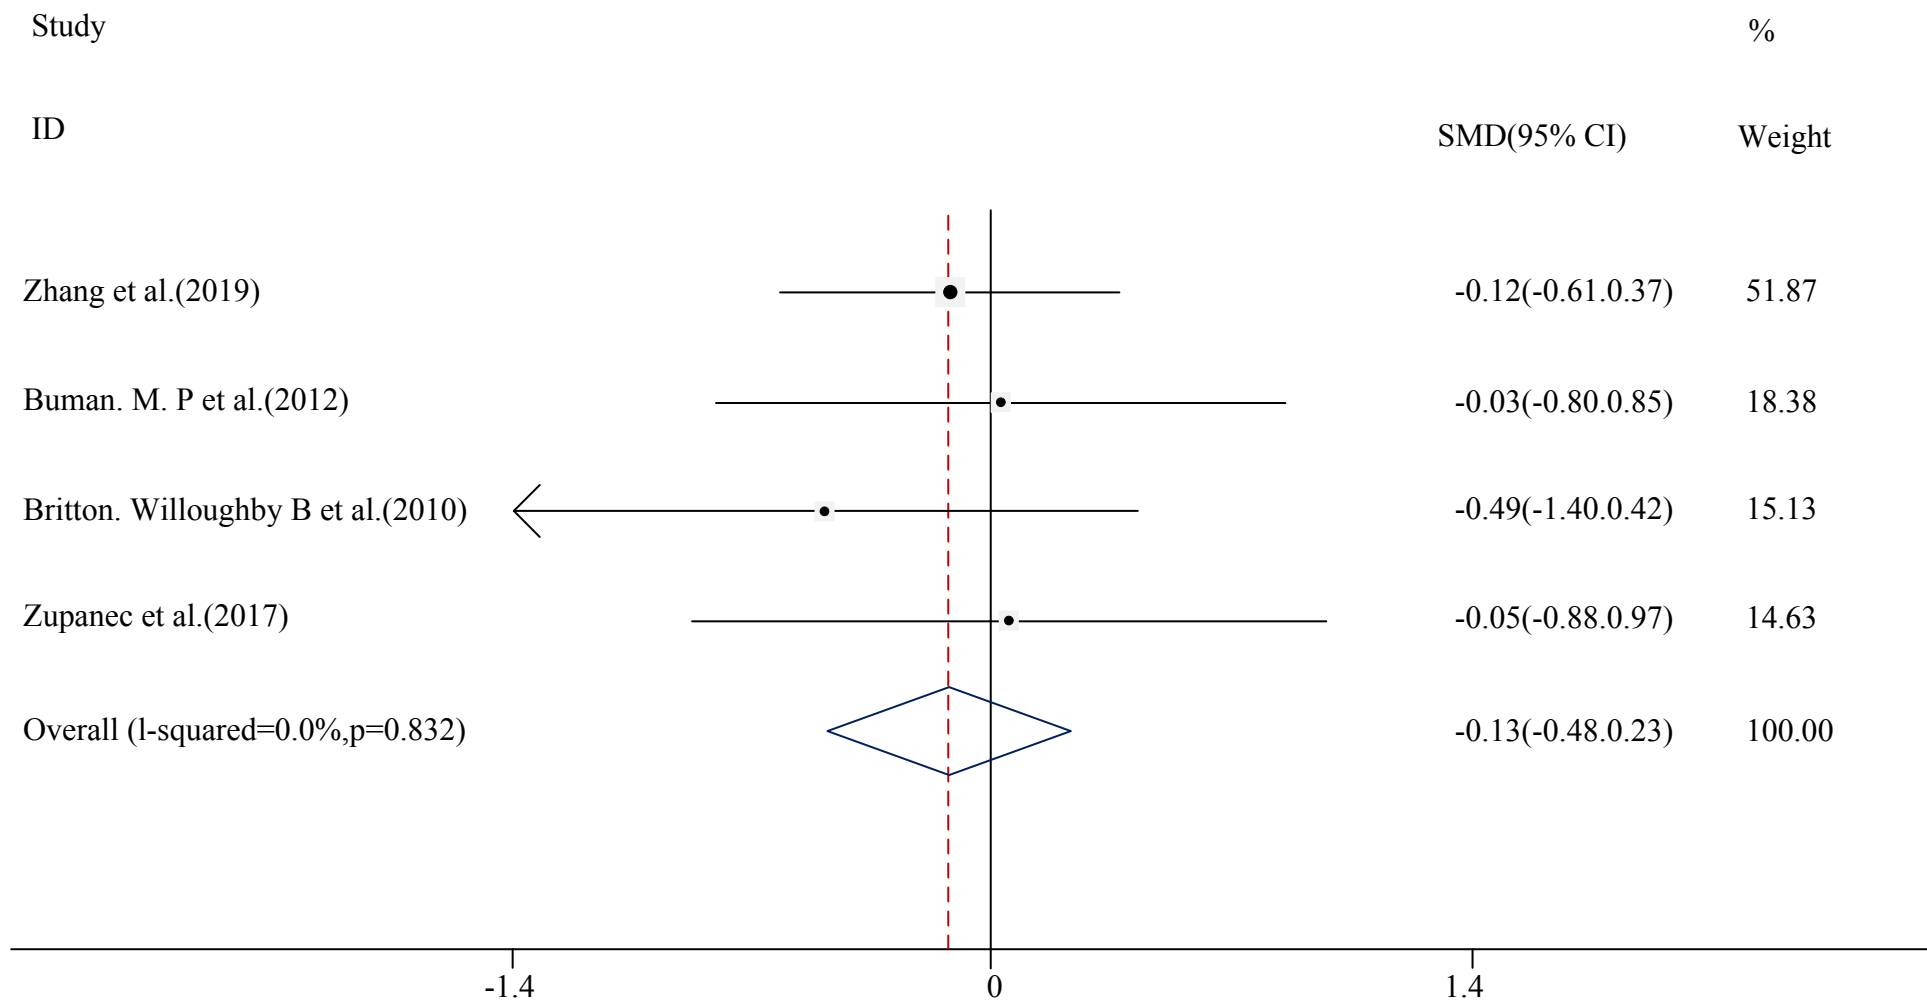

Supplement: s1 [file s1]
